# Supplementary material for: Germination and Growth of Spinach under Potassium Deficiency and Irrigation with High-Salinity Water
Source: MDPI journal article supplement (doi:10.3390/plants9121739), 2020-12-09
Supplement: s1 [file s1]

## Supplementary data

**Supplementary Table 1.** Concentrations of micronutrients in roots and shoots of 'Raccoon' for the respective combinations of NaCl (5.0 to 160.0 mmol $\cdot$ L<sup>-1</sup>) and K doses (0.07 to 3.0 mmol $\cdot$ L<sup>-1</sup>).

| K doses<br>(mmol $\cdot$ L <sup>-1</sup> ) | Root                                       |             |            |           |            | Shoot     |           |           |           |           |
|--------------------------------------------|--------------------------------------------|-------------|------------|-----------|------------|-----------|-----------|-----------|-----------|-----------|
|                                            | NaCl doses (mmol $\cdot$ L <sup>-1</sup> ) |             |            |           |            |           |           |           |           |           |
|                                            | 5.0                                        | 30.0        | 60.0       | 120.0     | 160.0      | 5.0       | 30.0      | 60.0      | 120.0     | 160.0     |
| <b>B (mg kg<sup>-1</sup>)</b>              |                                            |             |            |           |            |           |           |           |           |           |
| 0.07                                       | 33.15aA                                    | 16.25aB     | 18.92aB    | 14.64aB   | 19.97aB    | 40.63aA   | 26.59aB   | 31.41aAB  | 25.05aB   | 25.32aB   |
| 0.15                                       | 22.44bA                                    | 24.87aA     | 21.58aA    | 17.40aA   | 19.12aA    | 37.51aA   | 28.07aAB  | 24.55abB  | 23.90aB   | 29.00aAB  |
| 0.30                                       | 20.98bA                                    | 18.10aAB    | 20.80aA    | 9.66aB    | 17.57aAB   | 39.51aA   | 24.05aB   | 18.52bB   | 20.80aB   | 19.65aB   |
| 3.00                                       | 21.78bA                                    | 19.05aA     | 16.49aA    | 16.64aA   | 16.44aA    | 31.02aA   | 31.05aA   | 20.54abAB | 19.59aB   | 22.53aAB  |
| <b>Cu (mg kg<sup>-1</sup>)</b>             |                                            |             |            |           |            |           |           |           |           |           |
| 0.07                                       | 21.73abA                                   | 13.62bB     | 15.99aB    | 13.97aB   | 16.03aB    | 6.35bA    | 6.13aA    | 8.23aA    | 9.23aA    | 8.86aA    |
| 0.15                                       | 22.38aA                                    | 18.26aAB    | 16.15aBC   | 12.03aC   | 13.76aC    | 7.14bA    | 6.51aA    | 7.48aA    | 6.19aA    | 7.27aA    |
| 0.30                                       | 21.02abA                                   | 17.19abAB   | 14.16aBC   | 7.54bD    | 11.73aCD   | 8.31abA   | 7.10aA    | 5.27aA    | 6.60aA    | 7.88aA    |
| 3.00                                       | 17.64bA                                    | 15.35abAB   | 14.66aAB   | 11.48abB  | 12.66aB    | 12.78aA   | 5.89aB    | 5.98aB    | 5.91aB    | 7.92aB    |
| <b>Fe (mg kg<sup>-1</sup>)</b>             |                                            |             |            |           |            |           |           |           |           |           |
| 0.07                                       | 1469.03aA                                  | 1395.79aA   | 1242.51aAB | 569.12aC  | 673.90aBC  | 463.62aA  | 362.84aA  | 394.83bA  | 473.61aA  | 292.24aA  |
| 0.15                                       | 1556.31aA                                  | 1027.27abAB | 900.82aB   | 642.22aB  | 1002.10aAB | 430.43aB  | 237.00aB  | 791.15aA  | 440.40aB  | 298.49aB  |
| 0.30                                       | 1302.78aA                                  | 970.12abAB  | 866.72aAB  | 585.86aB  | 887.12aAB  | 502.15aA  | 431.21aA  | 245.21bA  | 526.60aA  | 371.19aA  |
| 3.00                                       | 1089.68aA                                  | 766.74bA    | 860.48aA   | 800.54aA  | 715.06aA   | 379.68aA  | 417.99aA  | 351.15bA  | 218.31aA  | 212.92aA  |
| <b>Mn (mg kg<sup>-1</sup>)</b>             |                                            |             |            |           |            |           |           |           |           |           |
| 0.07                                       | 257.73abC                                  | 500.85aA    | 374.06aB   | 343.37aC  | 244.43aC   | 111.04aC  | 160.82abA | 144.95bAB | 135.66aB  | 127.02aBC |
| 0.15                                       | 362.63aAB                                  | 420.99aA    | 445.18aA   | 291.96aBC | 246.73aC   | 130.16aB  | 163.88aA  | 172.40aA  | 118.31aBC | 105.60aC  |
| 0.30                                       | 248.49bBC                                  | 483.11aA    | 344.56aB   | 216.89aC  | 314.79aBC  | 119.68aB  | 169.47aA  | 117.28cB  | 113.25aB  | 108.89aB  |
| 3.00                                       | 347.26abA                                  | 414.31aA    | 359.31aA   | 220.16aB  | 210.86aB   | 132.11aAB | 137.17bAB | 152.17abA | 123.49aBC | 104.88aC  |
| <b>Zn (mg kg<sup>-1</sup>)</b>             |                                            |             |            |           |            |           |           |           |           |           |
| 0.07                                       | 31.02aAB                                   | 26.37aBC    | 24.55aC    | 21.87abC  | 34.13aA    | 31.43bA   | 29.49aA   | 31.75aA   | 33.85aA   | 41.97aA   |
| 0.15                                       | 32.51aA                                    | 22.46aC     | 23.47aBC   | 21.15abC  | 28.67abAB  | 44.36aA   | 29.09aB   | 29.07aB   | 26.64aB   | 38.88abAB |
| 0.30                                       | 32.07aA                                    | 21.55aBC    | 23.17aB    | 15.94bC   | 21.68cBC   | 44.11aA   | 29.33aB   | 25.80aB   | 26.68aB   | 27.86bB   |
| 3.00                                       | 23.33bA                                    | 21.05aA     | 24.21aA    | 23.70aA   | 24.82bcA   | 28.48bA   | 27.79aA   | 27.50aA   | 29.11aA   | 38.62abA  |

Means with different letters are significantly different from each other by Fisher's LSD test ( $p < 0.05$ ). Lowercase: comparisons between K doses, within each Na dose and micronutrient. Uppercase: comparisons between Na doses, within each K dose inside each micronutrient.

**Supplementary Table 2.** Concentrations of micronutrients in roots and shoots of 'Gazelle' for the respective combinations of NaCl (5.0 to 160.0 mmol<sub>e</sub> L<sup>-1</sup>) and K doses (0.07 to 3.0 mmol<sub>e</sub> L<sup>-1</sup>).

| K doses<br>(mmol <sub>e</sub> L <sup>-1</sup> ) | Root                                            |           |            |            |           | Shoot      |           |           |           |           |
|-------------------------------------------------|-------------------------------------------------|-----------|------------|------------|-----------|------------|-----------|-----------|-----------|-----------|
|                                                 | NaCl doses (mmol <sub>e</sub> L <sup>-1</sup> ) |           |            |            |           |            |           |           |           |           |
|                                                 | 5.0                                             | 30.0      | 60.0       | 120.0      | 160.0     | 5.0        | 30.0      | 60.0      | 120.0     | 160.0     |
| <b>B (mg kg<sup>-1</sup>)</b>                   |                                                 |           |            |            |           |            |           |           |           |           |
| 0.07                                            | 53.84aA                                         | 42.55aB   | 44.08aAB   | 38.78aB    | 40.79aB   | 50.95aA    | 50.09aA   | 51.12aA   | 47.49aA   | 44.74aA   |
| 0.15                                            | 45.06aA                                         | 37.40aA   | 39.98aA    | 37.80aA    | 41.54aA   | 54.26aA    | 51.86aA   | 46.50aA   | 49.25aA   | 53.68aA   |
| 0.30                                            | 51.60aA                                         | 46.30aAB  | 47.83aAB   | 41.03aB    | 40.31aB   | 55.67aA    | 56.08aA   | 57.37aA   | 55.39aA   | 50.77aA   |
| 3.00                                            | 47.74aA                                         | 42.66aA   | 43.00aA    | 42.58aA    | 40.48aA   | 62.71aA    | 53.08aAB  | 49.44aB   | 49.07aB   | 48.49aB   |
| <b>Cu (mg kg<sup>-1</sup>)</b>                  |                                                 |           |            |            |           |            |           |           |           |           |
| 0.07                                            | 17.18abA                                        | 10.99aABC | 13.48aAB   | 8.83aBC    | 7.06aC    | 8.66aA     | 8.37aA    | 8.96bA    | 9.30aA    | 8.10aA    |
| 0.15                                            | 12.81bA                                         | 8.64aA    | 11.24aA    | 8.78aA     | 8.51aA    | 8.73aB     | 8.99aB    | 18.50aA   | 8.01aB    | 8.61aB    |
| 0.30                                            | 12.32bA                                         | 10.47aA   | 9.96aA     | 8.20aA     | 8.78aA    | 6.56aA     | 7.06aA    | 7.63bA    | 7.44aA    | 7.71aA    |
| 3.00                                            | 19.33aA                                         | 10.28aB   | 9.29aB     | 9.16aB     | 7.65aB    | 6.47aA     | 8.53aA    | 6.68bA    | 6.78aA    | 7.70aA    |
| <b>Fe (mg kg<sup>-1</sup>)</b>                  |                                                 |           |            |            |           |            |           |           |           |           |
| 0.07                                            | 1601.20aA                                       | 1134.26aB | 1328.93aAB | 1014.99abB | 1068.39aB | 260.68aB   | 289.08aB  | 253.99bB  | 472.72aA  | 281.82aB  |
| 0.15                                            | 1943.66aA                                       | 1213.78aB | 1100.62aBC | 687.97bC   | 960.81aBC | 219.81aB   | 187.92aB  | 452.06aA  | 269.09bB  | 250.36aB  |
| 0.30                                            | 1683.09aA                                       | 1141.16aB | 930.07aB   | 820.65abB  | 837.95aB  | 226.82aA   | 213.51aA  | 290.49abA | 208.49bA  | 187.14aA  |
| 3.00                                            | 1676.00aA                                       | 1033.80aB | 1112.79aB  | 1171.67aB  | 1033.06aB | 203.42aA   | 192.45aA  | 204.16bA  | 331.50abA | 214.37aA  |
| <b>Mn (mg kg<sup>-1</sup>)</b>                  |                                                 |           |            |            |           |            |           |           |           |           |
| 0.07                                            | 372.31aA                                        | 347.27aA  | 383.64aA   | 275.97aA   | 312.90aA  | 102.04bB   | 122.07aAB | 142.96aA  | 111.37aAB | 112.81aAB |
| 0.15                                            | 487.25aA                                        | 390.48aAB | 334.35aAB  | 256.95aB   | 254.83aB  | 108.89abAB | 134.11aA  | 125.19aAB | 93.70aB   | 94.53aB   |
| 0.30                                            | 524.83aA                                        | 497.30aA  | 382.45aAB  | 278.63aB   | 279.71aB  | 126.20abAB | 133.53aA  | 109.03aAB | 104.38aAB | 95.00aB   |
| 3.00                                            | 414.49aAB                                       | 416.68aA  | 290.92aABC | 260.34aBC  | 184.87aC  | 139.37aA   | 140.25aA  | 117.00aAB | 92.38aB   | 81.87aB   |
| <b>Zn (mg kg<sup>-1</sup>)</b>                  |                                                 |           |            |            |           |            |           |           |           |           |
| 0.07                                            | 23.33aA                                         | 19.56aA   | 19.18aA    | 20.64bA    | 19.84aA   | 25.88aA    | 24.02aA   | 26.46aA   | 27.75aA   | 25.06aA   |
| 0.15                                            | 25.40aA                                         | 15.80aA   | 18.55aA    | 19.62bA    | 19.90aA   | 25.37aAB   | 25.89aAB  | 31.95aA   | 24.69aB   | 25.62aAB  |
| 0.30                                            | 25.34aB                                         | 18.75aB   | 20.25aB    | 36.68aA    | 18.87aB   | 25.65aA    | 24.39aA   | 26.58aA   | 23.07aA   | 23.46aA   |
| 3.00                                            | 27.50aA                                         | 21.20aA   | 24.33aA    | 22.83bA    | 18.72aA   | 23.63aA    | 27.78aA   | 25.40aA   | 24.60aA   | 25.49aA   |

Means with different letters are significantly different from each other by Fisher's LSD test ( $p < 0.05$ ).

Lowercase: comparisons between K doses, within each Na dose and micronutrient. Uppercase: comparisons between Na doses, within each K dose inside each micronutrient.
